# Supplementary material
Source: PubMed Central journal article supplement (PMC6610710)
Supplement: NIHMS1529473-supplement-1.pdf [file NIHMS1529473-supplement-1.pdf]

**Structure, Volume 27**

**Supplemental Information**

**Structure, Function, and Dynamics  
of the G $\alpha$  Binding Domain of Ric-8A**

**Baisen Zeng, Tung-Chung Mou, Tzanko I. Doukov, Andrea Steiner, Wenxi Yu, Makaia Papasergi-Scott, Gregory G. Tall, Franz Hagn, and Stephen R. Sprang**

**Table S1.**

Solvent accessible surface of, and spatial relationships between ARM and HEAT repeats of R432; Related to Figure 2B

| Intra-repeat parameters |               |             |                                      | Inter-repeat parameters |              |                   |                                     |
|-------------------------|---------------|-------------|--------------------------------------|-------------------------|--------------|-------------------|-------------------------------------|
| repeat                  | residue range | Repeat type | Intra-repeat SASA* (Å <sup>2</sup> ) | transition              | Rotation (°) | Center-Center (Å) | Inter-repeat SASA (Å <sup>2</sup> ) |
| 1                       | 1-36          | H           | 836                                  | -                       | -            | -                 |                                     |
| 2                       | 37-76         | H           | 953                                  | 1→2                     | 39           | 10.6              | 2043                                |
| 3                       | 77-128        | A           | 1415                                 | 2→3                     | 22           | 9.8               | 1978                                |
| 4                       | 129-174       | A           | 1338                                 | 3→4                     | 31           | 10.9              | 2191                                |
| 5                       | 175-236       | A           | 1695                                 | 4→5                     | 34           | 11.3              | 2342                                |
| 6                       | 237-282       | H           | 1200                                 | 5→6                     | 40           | 11.4              | 2490                                |
| 7                       | 283-344       | A           | 2250                                 | 6→7                     | 78           | 13.3              | 1948                                |
| 8                       | 345-400       | A           | 1791                                 | 7→8                     | 61           | 12.7              | 2193                                |
| 9                       | 401-429       | H           | 556                                  | 8→9                     | 114          | 11.7              | 1551                                |

\* Solvent Accessible Surface Area, computed using Mac PyMol version 1.7 Schödinger LLC. Rotation and translations were determined using the PyMol script *draw\_rotation\_axis* available at [https://raw.githubusercontent.com/PyMol-Scripts/PyMol-script-repo/master/draw\\_rotation\\_axis.py](https://raw.githubusercontent.com/PyMol-Scripts/PyMol-script-repo/master/draw_rotation_axis.py)

**Table S2.**

Fit of Models from SREFLEX normal-mode fitting of pR452 crystal structure to SAXS curves for phosphorylated (P01-5) and non-phosphorylated R452 (U01-5);  
Related to Figure 4

| model | Rotation of Segment 1 (°)* | Rotation of Segment 3 (°)* | RMSD (Å) | $\chi^2$ | clash | breaks |
|-------|----------------------------|----------------------------|----------|----------|-------|--------|
| P-01  | 13.64                      | 25.02                      | 3.66     | .24      | .09   | .03    |
| P-02  | 16.68                      | 20.43                      | 4.03     | .26      | 0     | 0      |
| P-03  | 12.5                       | 12.0                       | 3.08     | .27      | 0     | .01    |
| P-04  | 28.9                       | 48.99                      | 9.71     | .27      | .14   | .18    |
| P-05  | 12.3                       | 15.19                      | 3.66     | .28      | 0     | 0      |
| U-01  | 9.56                       | 26.31                      | 6.05     | .39      | 0     | .27    |
| U-02  | 24.57                      | 26.21                      | 5.78     | .44      | 05    | .19    |
| U-03  | 21.56                      | 34.14                      | 7.71     | .44      | 05    | .42    |
| U-04  | 16.74                      | 21.27                      | 3.95     | .44      | 0     | 0      |
| U-05  | 3.59                       | 23.25                      | 5.08     | .44      | .14   | .18    |

\* Magnitude of rotation of Segment 1 (residues 1-183) or Segment 3 (residues 288-430) relative to Segment 2 (residues 184-287) of the native crystal structure; RMSD between  $C_{\alpha}$  positions of the molecule B of pR452 and corresponding atoms of the model. Clash and break scores indicate the relative number of steric overlaps within the model structure and breaks in the polypeptide chain, respectively (Panjkovich and Svergun, 2016).

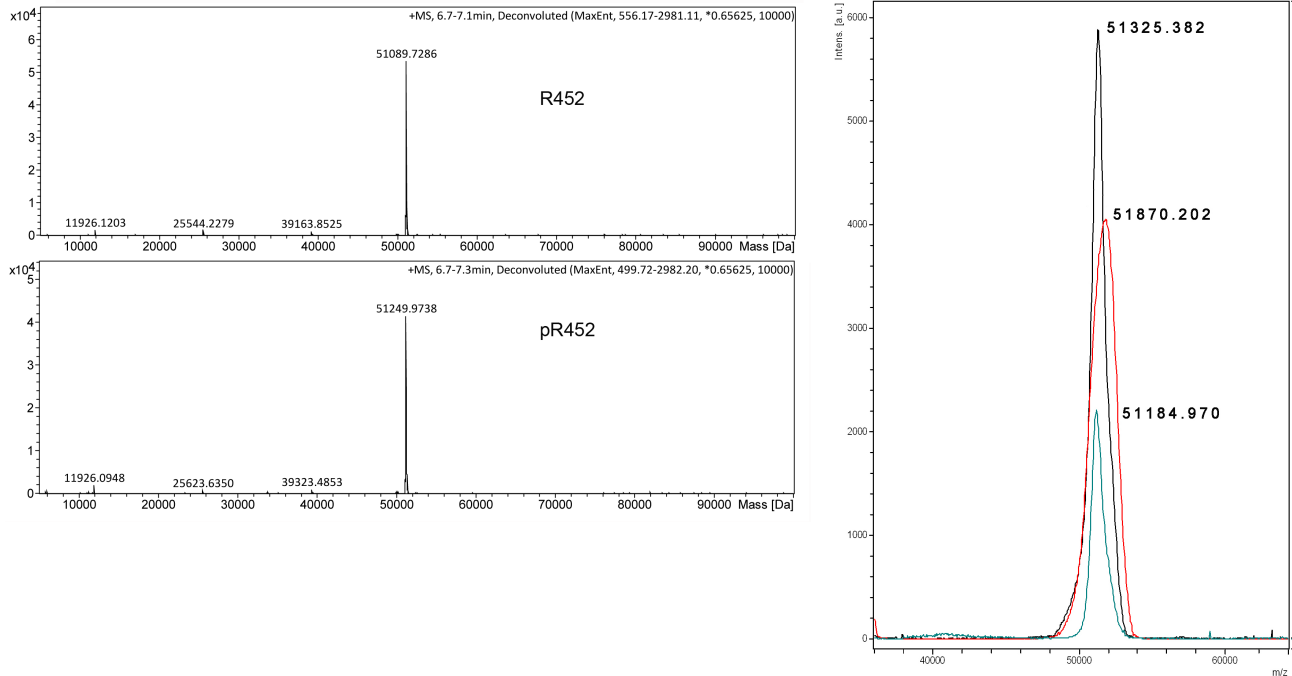

**Figure S1.** Casein Kinase II phosphorylates R452 at two sites. Related to Figure 1 and Figure 2. See STAR Methods for phosphorylation and Mass Spectrometry protocols. (A) triple quadrupole mass spectrometric analysis of phosphorylated and unphosphorylated Ric-8A. The mass difference between R452 and pR452 is 160.249 Da, consistent with phosphorylation at two sites. (B) MALDI-TOF mass spectrometry of dissolved crystals of pR452 crystals (red), purified R452 (cyan) and pR452 (black). Mass spectrometry experiments were performed using a microflex MALDI-TOF (Bruker) with flexControl (Bruker) software. Data was analyzed using flexAnalysis (Bruker) software.



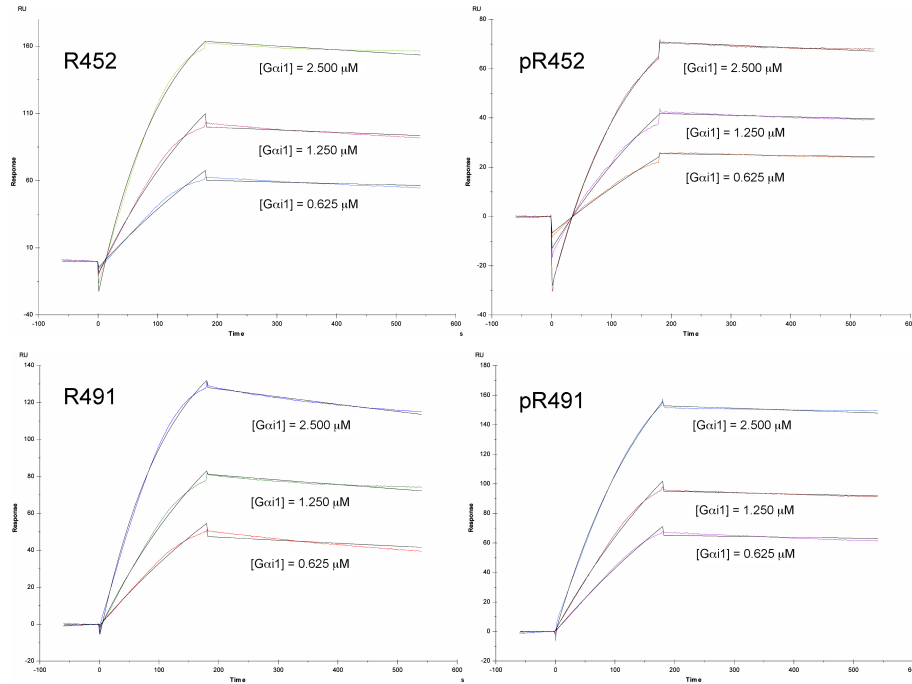

**Figure S2.** Kinetics of Ric-8A protein binding to  $G\alpha i1$  measured by surface plasmon resonance using a BiaCore X100 system (GE Healthcare). See STAR Methods. Related to Figure 1. N-terminally hexahistidine-tagged Ric-8A ligands (R452, pR452, R491, pR491) were anchored to an Ni-NTA sensor chip surface for 5 minutes. For the  $G\alpha i1 \cdot GDP$  analyte was applied to the ligand-coated sensor chip surface at each of a range of concentrations (0.625  $\mu M$ , 1.25  $\mu M$ , 2.5  $\mu M$ ). Binding and dissociation data were globally fit to a 1:1 binding model to generate a single  $k_{on}$  and  $k_{off}$  (See STAR Methods). Note that  $k_{on}$  is an apparent pseudo-first order association rate ( $M^{-1}s^{-1}$ ), and  $k_{off}$  is the dissociation rate ( $s^{-1}$ ). The apparent on-rate includes the kinetics of GDP dissociation from  $G\alpha i1$ , such that  $G\alpha i1 \cdot GDP$  is the species that associates with the chip-bound Ric-8A ligands, whereas it is nucleotide-free  $G\alpha i1$  that dissociates from ligand. Thus, the ratio  $k_{off}/k_{on}$  is not equivalent to the dissociation constant for the Ric-8A: $G\alpha i1 \cdot GDP$  complex.

| Ligand | $k_{on, \text{apparent}} (M^{-1}s^{-1})$ | $k_{off} (s^{-1})$           |
|--------|------------------------------------------|------------------------------|
| R452   | 3302 (205)                               | $1.52 (0.04) \times 10^{-4}$ |
| pR452  | 2664 (277)                               | $1.13 (0.04) \times 10^{-4}$ |
| R491   | 3190 (243)                               | $3.04 (0.04) \times 10^{-4}$ |
| pR491  | 2614 (424)                               | $8.94 (0.3) \times 10^{-5}$  |



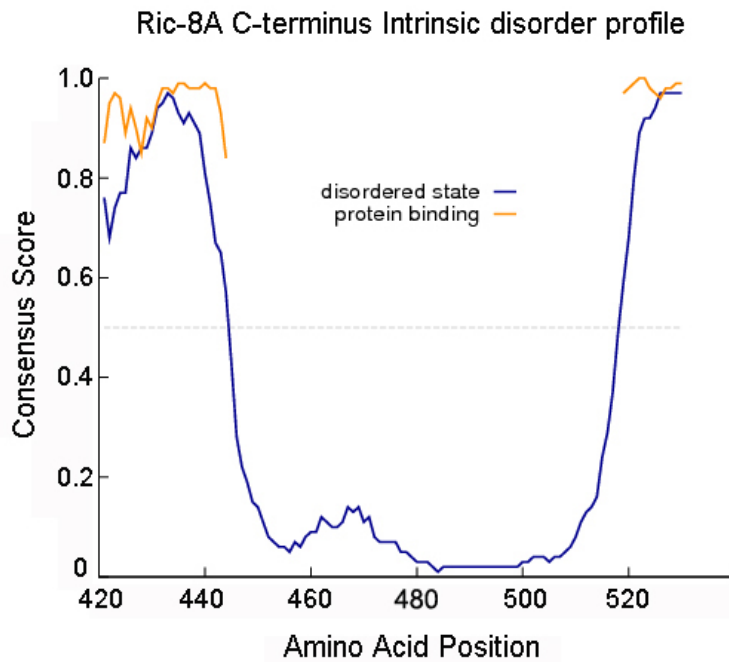

**Figure S4.** Prediction of disordered residues by DISOPRED-3 (Jones and Cozzetto, 2015). Related to Figure 2 and Figure 4. The grey dashed line indicates a confidence score of 0.5, above which the input sequence is considered disordered. The orange line shows the confidence of disordered protein binding residue predictions. DISOPRED-3 was accessed through the PSIPRED server <http://bioinf.cs.ucl.ac.uk/psipred/?disopred=1>

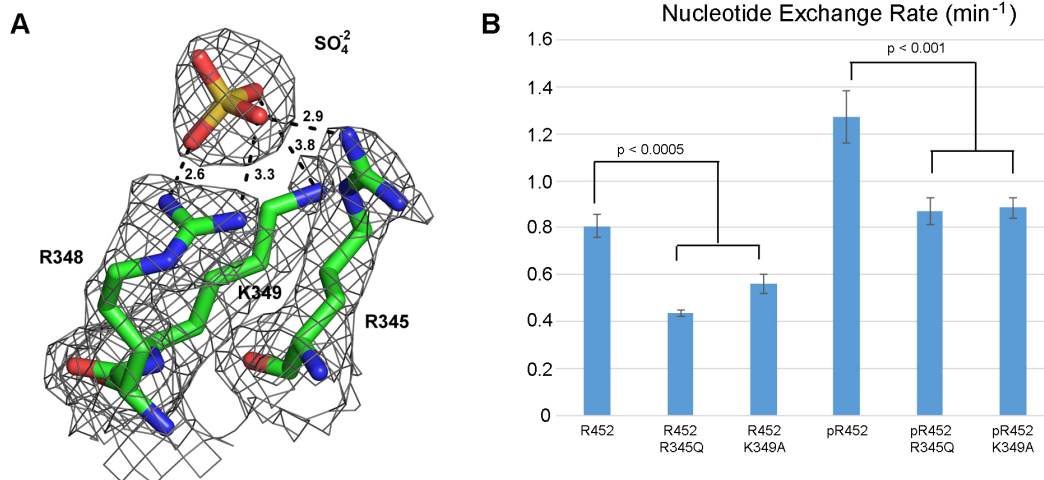

**Figure S5.** A potential phosphate-binding site near the N-terminus of  $\alpha 18$  composed of R345 and R348 of pR452, bound to a sulfate ion derived from crystallization buffer. Related to Figure 2 (A) The 2mFo-DFc map calculated with the final, refined phase set, is rendered at the 1.0  $\sigma$  contour level. Carbon atoms are colored *green*, nitrogen, *blue*, oxygen, *red*, sulfur, *yellow*. Interatomic contact distances shown with dashed lines with distances in Ångstrom units, Rendered using PyMOL V1.7, Schrödinger, LLC. Average B factors for guanidinium groups of Arg345 and Arg348 are 57Å<sup>2</sup> and 46Å<sup>2</sup>, respectively. The B factor for the N $\zeta$  of Lys349 is 56Å<sup>2</sup>. The overall B factor for the sulfate ion is 75Å<sup>2</sup>. These may be compared to the average B factor for all protein atoms, 47Å<sup>2</sup>. (B) Fluorimetric Guanine nucleotide exchange assay, conducted as described in (Kant, et al, 2016). See STAR Methods. Exchange reactions were conducted in buffer (50mM HEPES pH 8.0, 1 mM TCEP, 150 mM NaCl and 10 mM MgCl<sub>2</sub>) containing 10 mM GTP $\gamma$ S, 2 $\mu$ M R452 or pR452 or mutants thereof as indicated, and 2 $\mu$ M G $\alpha$ i1 at a reaction temperature of 25°. Reaction volume was 500 $\mu$ l. Reaction was initiated by addition of G $\alpha$ i1•GDP to R452 mixture and G $\alpha$ i1•GTP $\gamma$ S measured by fluorescence emission at 345nm (excitation wavelength 295nm) in an LS55 luminescence spectrometer (PerkinElmer Life Sciences). Three to 5 replicates were taken for each data set and significance of differences was estimated by a Student's T-Test.

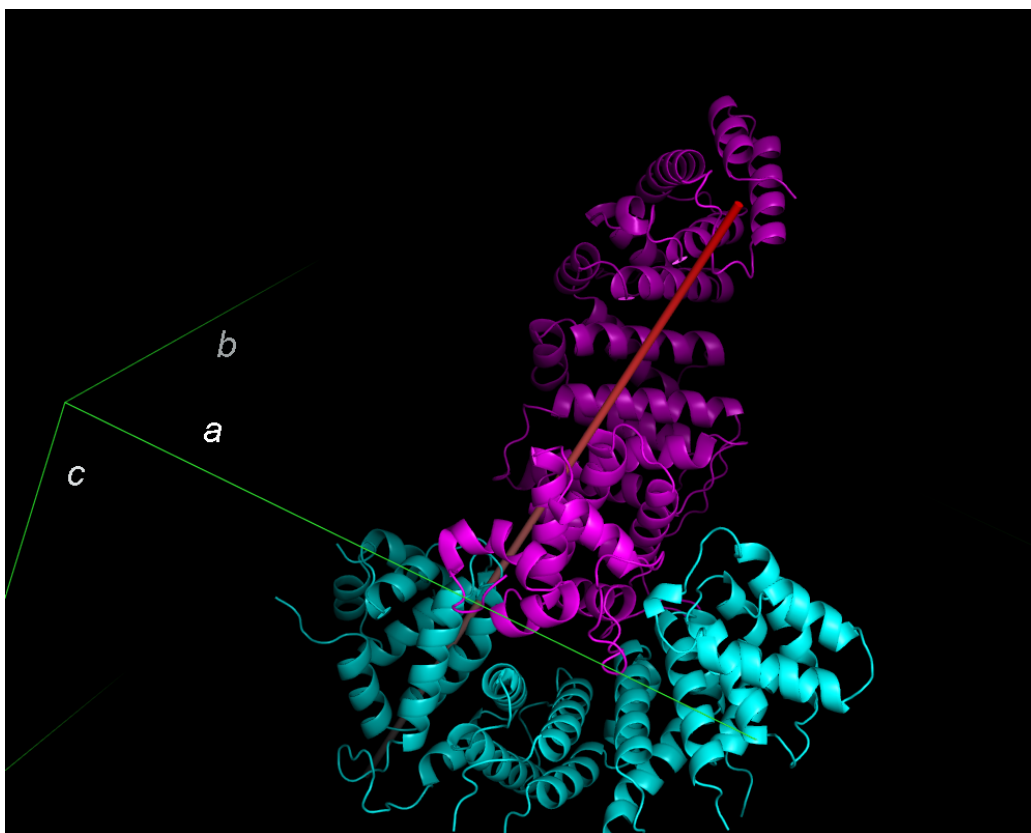

**Figure S6** Symmetry relationship and packing interactions between pR452 molecules A and B. Related to Table 1 and Figure 2. The red line shows the screw axis that relates the two molecules in the asymmetric unit by a  $110^\circ$  rotation and a translation of 29Å. This packing interaction arises from an extensive interface formed by  $\alpha 18$  and  $\alpha A9$  motifs of molecule B with the C-shaped cavity formed by multiple ARM/HEAT repeats of molecule A. The corresponding surface of molecule B forms similar, but less intimate contacts with the  $\alpha 18$  and  $\alpha A9$  motifs of a symmetry-related copy of Molecule A. The rms deviation between the  $C\alpha$  atoms of molecule A and molecule B is 0.78 Å (346 atoms aligned). The PyMOL script *draw\_rotation\_axis* available at [https://raw.githubusercontent.com/Pymol-Scripts/Pymol-script-repo/master/draw\\_rotation\\_axis.py](https://raw.githubusercontent.com/Pymol-Scripts/Pymol-script-repo/master/draw_rotation_axis.py) was used to compute the superposition matrix and derive screw-axis parameters.



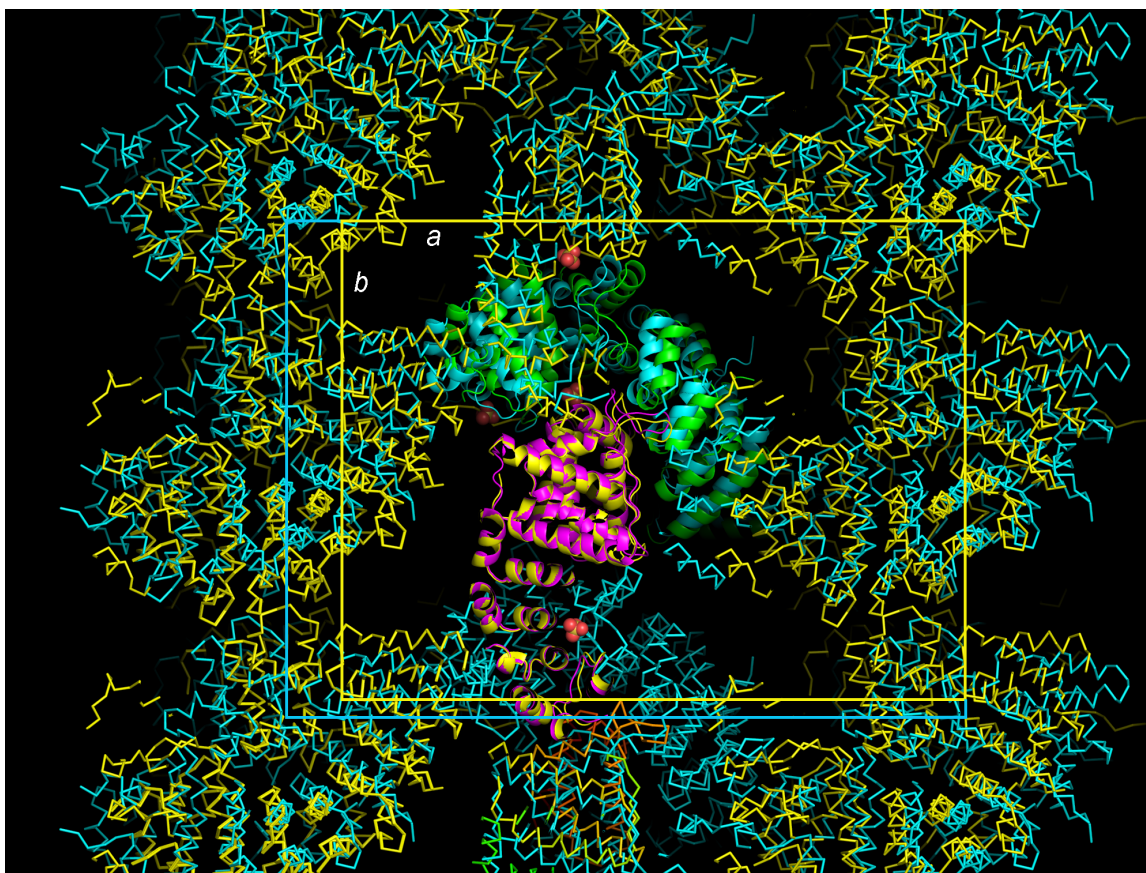

**Figure S7.** Immersion of pR452 crystals in paratone-N (Hampton) causes lattice contraction along all three unit cell axes. Related to Table 1. The crystal lattices of the native and paratone-N-soaked crystals and their contents are colored *cyan* and *yellow*, respectively and aligned by superposition of molecule B (symmetry equivalent  $x,y,z$ ) of the native structure (cartoon ribbon colored *magenta*) with the corresponding molecule in the paratone-N-soaked crystals (cartoon ribbon colored *yellow*). Molecules A are shown as *cyan* (native crystals) and *green* (paratone) ribbons. Sulfate ions that are present in native, but not paratone-N soaked crystals are shown as van der Waals spheres. Oil immersion causes changes in packing interactions (including those between molecules A and B), but only minor distortion of pR452 itself (rms differences at  $C\alpha$  positions =  $0.63\text{\AA}$  (365 atoms aligned) and  $0.64\text{\AA}$  (344 atoms aligned) for chains A and B, respectively, relative to their counterparts in native crystals). Figure produced using Mac PyMOL, Version 1.7 Schrödinger LLC.

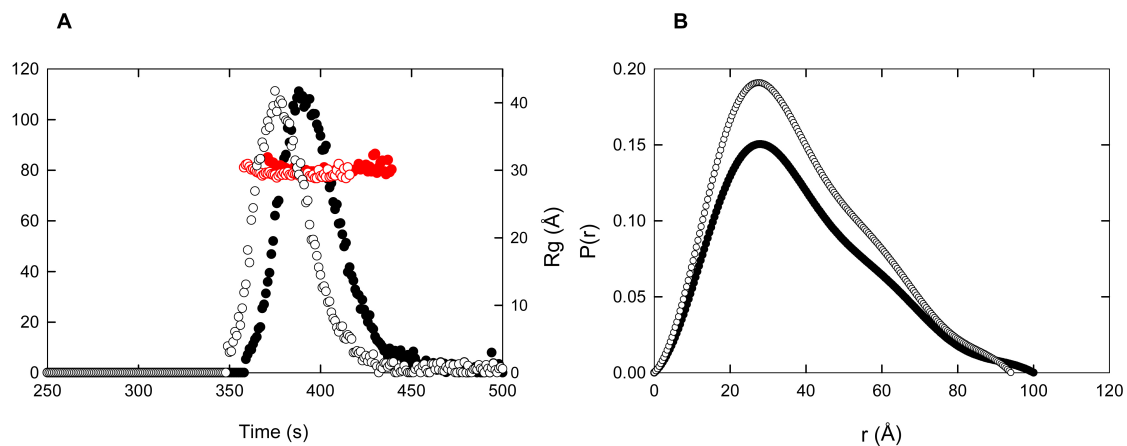

**Figure S8.** (A) SEC-SAXS chromatography of R452 (closed circles) and pR452 proteins (open circles);  $I(0)$  (black) and  $R_g$  (red) are plotted as a function of time as sample passing through the S200 Increase 1.3/300 column. (B) pair distribution function,  $P(r)$ , computed using the GEOM indirect transform program in the ATSAS program suite. Related to Table 2 and Figures 3 and 4.
